# Supplementary material for: “I feel better as a parent” – summer programs help support children’s health behaviors and parent wellbeing
Source: Research Square preprint supplement (doi:10.21203/rs.3.rs-9125988/v1), 2026-04-23
Supplement: Supplementary file 1 [file 1ddf09acedc0deae73d7c8ce.docx]

**Additional file 4: Family experience of summer holidays**

| **Theme** | **Explanation** | **Example** |
| --- | --- | --- |
| Family functioning and roles | Parents reported that while their family roles (e.g., primary caregiving, meal preparation) generally remained the same between school and summer, the time demands of these roles often shifted. For example, when childcare or camp arrangements were unavailable, parents spent more time providing direct care.  Many described increasing pressures in summer. They described the difficulty of juggling multiple demands on their time and attention including work commitments, necessity to generate an income, provision of basic care for their children (meals and supervision) and spending quality time with their children.  Some families had the ability and resources to adapt and adjust to the changes that occur over summer. For them, the absence of school reduced external pressures and demands (e.g., no school-morning rush, no homework) and opportunities for family holidays. | [T19, high-attender]  It's usually a big shift, because unlike when they're at school, once they come home, they're usually home all day. And I am a single mother, so this, I have to work, and so it's kind of a really, really big shift, because it's hard because they don't let you off just because your kids are out.  [T07, low-attender]  I tend to do all of the main roles for running the kids around and doing food and stuff. So then when it gets to summer, I find it sometimes even more difficult, because I'm trying to fit in my work around all those other things.  [T15, non-attender]  I mean, to be honest, I love being with her… I wouldn't say that (it’s stressful), I think when they were younger, it would have been a relief. Just to go to camp. I think when she was younger, we look for different activities, week-long camps during the summer, just, just to get her out of the house. So, I can have a peace, a minute. But I don't feel that way now. Now, I, she’s, I love being with her.  [T17, control]  Like, I don't have to, like, worry about picking her up from school. I don't have to worry about, hey, we got homework due. Let's cram it. And it's like, I can't really take the time that she needs, because I'm like, “Come on. Like, let's go. Let's go!” |
| Time-use and daily routines | Families described summer as a time with fewer external structures, leaving children with more freedom and parents with greater responsibility for organising activities.  Families’ experiences and strategies to manage these changes varied. For some families, household routines (meals, bedtime, hygiene) remained largely unchanged, while others allowed far greater flexibility, reflecting a spectrum from maintaining school-like schedules to embracing a more relaxed pace. It was common for parents to try to tighten routines again as the school year approached.  Children’s preferences also varied. Some children preferred unstructured relaxation, while others sought outings and stimulation, and parents sometimes struggled to balance these different needs, particularly with multiple children. | [T06, high-attender]  I wouldn't say (our routines change), no, our family routine is pretty much the same, like we eat dinner together at the same time every day, bedtime at the same time, bath and showers at the same time, I wouldn’t say it's any different.  [T07, low-attender]  Now, I do give them a little more leniency for bedtime during the summer, although we do still try to keep the general routine there, because I don't like having to re-train them back on the sleep routine for the school year, because that becomes a big task.  [T17, control]  I really don't care what time she wakes up in the morning. I really don't care what time she goes to bed, (laughs) because it's summer. Um, unless she really has something important to do the very next day… I guess the change, the shift, is, like, she really doesn't have a routine during the summer, like she does during school.  [T08, control]  Well, every child is different. (My son says) “yes, I'm home, I get to relax, I can play my video games.” And (my daughter is) just like, “Yay, well, what can we do? What are we going to get into? Are we going to the beach?”, things like that. |
| Health behavior shifts | Parents described taking on greater responsibility for regulating children’s health behaviors during summer, particularly around sleep, screen use, diet, and physical activity. This required extra effort and was often constrained by the limited availability and affordability of structured options to support children’s health. | [T12, high-attender]  (Being home) triples the screentime. Even though my husband may be at home, he's working from home. So still not able to engage with her which means, … she is probably either watching TV, some YouTube or a tablet or, or something.  [T07, low-attender]  We do have my mother-in-law, who very graciously, has allowed our kids to stay with her during the day through the summer. However, we've noticed that there's not a whole lot of activity, and it gets very boring for them, to kind of, stay in the same place throughout the summer, not being out with friends and doing activities and that sort of thing.  [T08, control]  (My daughter) wanted to do something this summer, but I really couldn't find much for her, to stay affordable for me, for her to get into… It’s super-hot. Walking into an oven... (my son) doesn't like the heat. At all. We went to the park for a little bit, yesterday... He was miserable. |
| Financial challenges | Families faced financial pressures in summer particularly to provide food, childcare or enrichment activities for children. Families tried to find free or affordable activities and looked for help from extended family where possible. | [T16, high-attender]  And then, it makes it a little frustrating that, you know, you do want to spend more time with your kids in the summer, but you know, you gotta work and make money, you know. Just things like that. You know, this year they didn't get to go to many places like on vacation, because of the, um... Things have been a little bit tighter. It is a challenge, to keep them occupied, they want to go places, things like that. I have to look for free things. Or like, I have to budget it in.  [T08, control]  Finding something for them to do… You know, just try to take them to the movies or something when I can. But everything seems to be getting so expensive… They wanted to go to the zoo... well okay let’s see how much that’s going to be… it's going to be $95 for us to get in the zoo? Ninety-five dollars! I said, oh no, we might have to wait. We can do a movie night or something, like here. |
| Psychosocial impacts | There was variability in experienced stressors over the summer holidays. Families that struggled to manage their family roles with work responsibilities faced mental, social and emotional challenges. Parents experienced pressures whilst having to navigate family dynamics. For children with fewer opportunities for social engagement and development activities, this sometimes meant an increase in challenging behaviors for parents to manage. These challenges increased emotional strain for some parents.  Conversely, families who were better able to manage daily routines in the absence of school (e.g., teachers on leave for the summer, stay-at-home parents) were able to enjoy the benefits of summer, including spending more quality time together. As a result, these families seemed to experience social, emotional and mental health benefits from the summer holidays including more relaxation and less stress. | [T02, high-attender]  Um, I do know, like my anxiety is a little bit more up than usual. Because, you know, sometimes going to something, you know, you got to figure out a way for them to be watched while you work.  [T14, high-attender]  I feel less stress during the summer, you know. I don’t have to worry about schoolwork, and all that, grade grades and things like that (laughs).  [T09, high-attender]  It's so hot, so we don't get like them outside to play as much, so just inside time, maybe just a little bit more. There's a little bit more energy, like a little bit more sibling fighting going on.  [T23, control]  I'm concerned. You know, I try...I don't want him to just be here all day by himself… And I feel bad for him, that he has to spend this the summer that way…  [T13, control (attended other program)]  Summers are a little bit more relaxed just for us. In general, because [...] the schedule isn't so tight, because I don't have to wake up. You know, they don't have to wake up at like five o'clock in the morning. So, we're able to just have, to me like, more fun. So, when we think about summer, we always think about fun. |
