# Supplementary material for: “I feel better as a parent” – summer programs help support children’s health behaviors and parent wellbeing
Source: Research Square preprint supplement (doi:10.21203/rs.3.rs-9125988/v1), 2026-04-23
Supplement: Supplementary file 2 [file 4c397098174626d0ccc8360e.docx]

**Additional file 1: COREQ Checklist**

| **Consolidated criteria for reporting qualitative studies (COREQ): 32-item checklist** | | | |
| --- | --- | --- | --- |
| **Item** | **Questions** | **Description** | **Reported** |
| **Domain 1: Research team and reflexivity** | | |  |
| Personal Characteristics | |  |  |
| 1 | Interviewer/facilitator | Which author/s conducted the interview or focus group? | Methods, p 5-6. |
| 2 | Credentials | What were the researcher’s credentials? e.g., PhD, MD | Methods, p5-6. |
| 3 | Occupation | What was their occupation at the time of the study? | Methods, p6. |
| 4 | Gender | Was the researcher male or female? | Methods, p5. |
| 5 | Experience and training | What experience or training did the researcher have? | Methods, p6. |
| Relationship with participants | |  |  |
| 6 | Relationship established | Was a relationship established prior to study commencement? | Methods, p6. |
| 7 | Participant knowledge of the interviewer | What did participants know about the researcher? e.g., personal goals, reasons for doing the research | Methods, p6. |
| 8 | Interviewer characteristics | What characteristics were reported about the interviewer/facilitator? e.g., bias, assumptions, reasons and interests in the research topic | Methods, p6. |
|  |  |  |  |
| **Domain 2: Study design** | |  |  |
| Theoretical framework | |  |  |
| 9 | Methodological orientation and theory | What methodological orientation was stated to underpin the study? e.g., grounded theory, discourse analysis, ethnography, phenomenology, content analysis | Data analysis p6-7. |
| Participant selection | |  |  |
| 10 | Sampling | How were participants selected? e.g., purposive, convenience, consecutive, snowball | Methods, p5 |
| 11 | Method of approach | How were participants approached? e.g., face-to-face, telephone, mail, email | Methods, p5 |
| 12 | Sample size | How many participants were in the study? | Methods, p5 |
| 13 | Non-participation | How many people refused to participate or dropped out? Reasons? | Methods, p5 |
| Setting |  |  |  |
| 14 | Setting of data collection | Where was the data collected? e.g., home, clinic, workplace | Methods, p6 |
| 15 | Presence of non-participants | Was anyone else present besides the participants and researchers? | Methods, p6 |
| 16 | Description of sample | What are the important characteristics of the sample? e.g., demographic data, date | Methods, p5 |
| Data collection | |  |  |
| 17 | Interview guide | Were questions, prompts, guides provided by the authors? Was it pilot tested? | Methods, p6 |
| 18 | Repeat interviews | Were repeat interviews carried out? If yes, how many? | Methods, p6 |
| 19 | Audio/visual recording | Did the research use audio or visual recording to collect the data? | Methods, p6 |
| 20 | Field notes | Were field notes made during and/or after the interview or focus group? | Methods, p6 |
| 21 | Duration | What was the duration of the interviews or focus groups? | Methods, p6 |
| 22 | Data saturation | Was data saturation discussed? | Methods, p6 |
| 23 | Transcripts returned | Were transcripts returned to participants for comment or correction? | Methods, p6 |
|  |  |  |  |
| **Domain 3: analysis and findings** | |  |  |
| Data analysis | |  |  |
| 24 | Number of data coders | How many data coders coded the data? | Methods, p6-7 |
| 25 | Description of the coding tree | Did authors provide a description of the coding tree? | Methods, p 7, Additional file 3. |
| 26 | Derivation of themes | Were themes identified in advance or derived from the data? | Methods, p6-7 |
| 27 | Software | What software, if any, was used to manage the data? | Methods, p6-7 |
| 28 | Participant checking | Did participants provide feedback on the findings? | Methods, p6 |
| Reporting | |  |  |
| 29 | Quotations presented | Were participant quotations presented to illustrate the themes/findings? Was each quotation identified (e.g., participant number)? | Yes – see results |
| 30 | Data and findings consistent | Was there consistency between the data presented and the findings? | Yes – see results |
| 31 | Clarity of major themes | Were major themes clearly presented in the findings? | Yes – see results |
| 32 | Clarity of minor themes | Is there a description of diverse cases or discussion of minor themes? | Yes – see results |

Allison Tong, Peter Sainsbury, Jonathan Craig, Consolidated criteria for reporting qualitative research (COREQ): a 32-item checklist for interviews and focus groups, *International Journal for Quality in Health Care*, Volume 19, Issue 6, December 2007, Pages 349–357, <https://doi.org/10.1093/intqhc/mzm042>

Booth, A., Hannes, K., Harden, A., Noyes, J., Harris, J. and Tong, A., 2014. COREQ (consolidated criteria for reporting qualitative studies). *Guidelines for reporting health research: a user's manual*, pp.214-226.
