# Supplementary material for: “I feel better as a parent” – summer programs help support children’s health behaviors and parent wellbeing
Source: Research Square preprint supplement (doi:10.21203/rs.3.rs-9125988/v1), 2026-04-23
Supplement: Supplementary file 3 [file 51f7a845f4dcaaf2eceeac58.docx]

**Additional file 2: Parent interview guide**

**Parent Interview Guide**

| **AIM:** To understand the benefits/challenges of summer programming  **AIM:** To understand the benefits/challenges of summer day camp on families receiving free summer day camp vs summer as usual.  **AIM**: To understand differences in parent’s perceived barriers/challenges to feeding their children in the summer when receiving free summer day camp vs summer as usual.  *Feeding refers to the action of both feeding their children (preparation/cooking/eating) and providing food (grocery shopping/meal planning) |
| --- |

Hi {parent name}. This is {Researcher Name} with the University of South Carolina.

Thank you so much for talking with me today.

The purpose of this interview is to learn more about your summer, and experience in the Beyond the Bell Study.

**We wanted to talk with you today because your child received a free summer day camp.** We would like to understand how attending a free summer day camp impacted your child, yourself, as well as your family.

For these interview questions, there are no right or wrong answers and everything you say will be kept confidential. We hope to make you feel comfortable sharing your personal experiences, perspectives, and thoughts. We want to know what was helpful and what we can do to improve. I will ask you a question and wait for you to respond. Sometimes I will ask follow-up questions or summarize what you are saying to ensure that I understand you.

Before we get started, I want to let you know that we will be audio-recording our conversation so that we can review it later. Is this okay with you?

Do you have any questions before we get started?

| **General Summer** | |
| --- | --- |
| **Questions** | **Probes** |
| Talk to me about the shift from your child attending school, to being in the summer. | What are some changes/differences?  Do family roles or dynamics change?  How does the summer impact you? (ex. Stressed)  What challenges do you experience? |
| Tell me about your experiences with summer programming (SFSP, day camps, etc.) | What are some challenges with these programs?   - How do you overcome them?   What are some benefits to these programs?  How could these programs be improved? |
| **Summer Day Camp** | |
| **Questions** | **Probes** |
| **This summer your child had the opportunity to attend free summer day camp.** | |
| Talk to me about some of the ways, if any, free summer day camp impacted you and your family. | What were some of the benefits to SDC?  Did you experience any challenges?   - How did you overcome them?   How did it impact your child? |
| How would this summer have been different if you had not received free summer day camp? | Financial?  Wellbeing?  Relationship with family members? |
| **Feeding Children During Summer** | |
| **Questions** | **Probes** |
| **Now I want to get a little more specific. We are going to talk about food and meals during the summer. This includes providing food, preparing and planning meals, and what they eat.** | |
| Talk to me about food and meals this summer. | What does your typical meal schedule look like?  What meals did you provide?   - How is this different from past summers, if at all?   What foods do you typically buy?   - How did you decide what foods to buy? - How did the amount/types of food you bought this summer change?   How did you feel when planning/prepping food for your family this summer? (Stressed/worried)   - How does this compare to usual summers?   What challenges have you experienced providing food for your family THIS summer?   - Different from summers past? - How did you overcome them? |
| **Your child was provided meals at camp each day…** | |
| How does having your child eat at SDC impact feeding your child/children during the summer? | What were the benefits of your child receiving free meals/snacks at camp?   - For child? - For you?   What do you think about SDCs providing meals/snacks to children? |
| How would providing food for your child/children have been different if you did not receive free summer day camp (maybe if camp did not provide meals??) | How important is it that your child has access to free summer meals?  What are some ideas/ways you could be better supported accessing free meals during the summer? |

Hi {parent name}. This is Meghan with the University of South Carolina.

Thank you so much for talking with me today.

The purpose of this interview is to learn more about your summer, and experience in the Beyond the Bell Study.

**We wanted to talk with you today because you enrolled in this study but participated in your usual summer.** We would like to understand how the summer vacation impacts your child, yourself, as well as your family.

For these interview questions, there are no right or wrong answers and everything you say will be kept confidential. We hope to make you feel comfortable sharing your personal experiences, perspectives, and thoughts. We want to know what was helpful and what we can do to improve. I will ask you a question and wait for you to respond. Sometimes I will ask follow-up questions or summarize what you are saying to ensure that I understand you.

Before we get started, I want to let you know that we will be audio-recording our conversation so that we can review it later. Is this okay with you?

Do you have any questions before we get started?

| **General Summer** | |
| --- | --- |
| **Questions** | **Probes** |
| Talk to me about the shift from your child attending school, to being home this summer. | What are some changes/differences?  What is your schedule like in the summer?  How do family roles or dynamics change, if at all?  How does the summer impact you? (ex. Stressed)  What challenges do you experience? |
| Tell me about your experiences with summer programming (SFSP, day camps, etc.) | What are some challenges with these programs?   - How do you overcome them?   What are some benefits to these programs?  How could these programs be improved? |
| **Summer As Usual (control)** | |
| **This year you enrolled your child in the Beyond the Bell study, which sent some kids to summer day camp, while others continued with their usual summer. Your child was randomly selected for a usual summer. This summer, did your child attend any summer programming?** | |
| **Did NOT Attend Programming** | |
| **Questions** | **Probes** |
| What are some reasons you did **not** attend a summer program THIS summer? | What were some challenges to attending? (financial, time, transportation??)  How could you be better supported in the future  What would your ideal summer program include? |
| Hypothetically, if your child was enrolled in summer programming, what benefits could you expect? | Would that have helped you overcome challenges mentioned before?  Would you expect any challenges?   - How would you overcome these? |
| **Attended Programming** | |
| **Questions** | **Probes** |
| What summer program did you enroll in, and why? | What were some benefits of this program?  What were some challenges of this program? |
| **Feeding Children in Summer as Usual** | |
| **Questions** | **Probes** |
| Talk to me about food and meals this summer. | What does your typical meal schedule look like?  What meals did you provide?   - How is this different from past summers (or school year?), if at all - How do you feel about the meals you provide?   What foods did you typically buy?   - How did you decide what foods to buy? - How did the amount/types of food you bought this summer change (from school year?)   How did you feel when planning/prepping food for your family this summer? (Stressed/worried)   - How does this compare to usual summers/school year?   What challenges have you experienced providing food for your family THIS summer?   - Different from summers past? - Different from the school year? - How did you overcome them? |
| What are some ideas/ways you can be better supported with accessing free summer meals? | How can we better inform families of summer meals?  How important is it that your child has access to free summer meals? |
| **Attended Programming (including question above)** | |
| How does having meals/snacks provided at programming impact feeding your child/children during the summer? | What were the benefits of your child receiving free meals/snacks at camp?   - For child? - For you? |
