# Supplementary material for: “I feel better as a parent” – summer programs help support children’s health behaviors and parent wellbeing
Source: Research Square preprint supplement (doi:10.21203/rs.3.rs-9125988/v1), 2026-04-23
Supplement: Supplementary file 4 [file b3519e22a9c27d66d2d4154b.docx]

**Additional file 5: Benefits and challenges of structured summer programs**

| **Theme** | **Explanation** | **Example** |
| --- | --- | --- |
| **Child factors** | | |
| Benefits | Summer programs got children out of the house, off devices and into more active, fun and cognitively stimulating environments. Parents felt these opportunities for physical activity, learning, and social engagement supported children’s health and wellbeing which had further positive psychosocial benefits for children who, because of attending programs experienced less boredom, seemed happier and displayed better mood. | [T14, high-attender]  Well, benefits, for him, is he's staying active. He's socializing, you know. It tires him out, but it's still good for him, rather than being at a house, or at somebody's house, and just sitting around all day or something, you know, playing video games all day.  [T05, control (attended other program)] –  He gets to play, go outside, interact with other kids. They also have like fun activities like … to go to the library, go to the movies, to the splash pad. While, if he gets like just home, he stays home for the whole summer, it's just like playing in a phone or tablet or something.  [T11, control (attended other program)]  To me, I just like the social part of it, for him… Learning how to be with people, learning how to deal with certain situations that he wouldn't encounter at home. So, he can come home, like, tell us about it. We can work through it.  [T04, non-attender (chose to attend a different program)]  He actually made a lot of friends. He actually was more social with the kids. He talked a lot more, and he enjoyed himself a lot more, and he was excited to go. |
| Challenges | Child-related challenges to program attendance included child resistance, medical conditions (e.g., severe allergies) and managing children at different camp facilities. | [T08, control]  Um, when they were at summer camp – they went to summer camp last year – (sibling’s name) loved it. It gave her something to do. Like I said, (child’s name)’s my homebody. He did not like, he did not want, he did not want to do that.  [T04, non-attender (chose to attend a different program)]  Sometimes he doesn't want to go. Sometimes he does. It just depends. He likes small settings, like he doesn't like when it's too many kids, and my daughter's opposite. So… |
| **Parent factors** | | |
| Benefits | Summer programs solved practical challenges for parents by providing childcare that allowed parents to continue to work and complete tasks/chores with greater ease. Summer programs also helped parents manage family functions (regulating daily routines, keeping kids more active).  Because camps addressed some of the practical and logistical challenges of summer, they had psychosocial benefits for parents too. Some parents appreciated respite from being the primary carer.  Parents felt relief because financial burdens were reduced. They also expressed that summer programs helped them with fatigue because a lack of time and energy made it difficult to meet their child’s needs. | [T13, control (attended other program)]  Me having an opportunity to go to work without leaving them here by themselves all day. Me having a peace of mind knowing that, where they're at, they are safe. So, I think that's the biggest thing.  [T07, low-attender]  It benefits me in her general attitude, and also, you know, when the kids are more active, … and having a way to let out their energy. … That energy, if it's not let out in a productive way, then they let out in destructive ways, like fighting with each other and that kind of thing.  [T10, non-attender]  I was able to work during the day, while she was in summer camp. And when she gets home, it was easier to get her to bath and relax and go back to bed to start her new day.  [T17, control]  It's all about my children, … being able to put her in the camp, or her to go to the camp, would probably make me feel better as a parent, to say that my child has something to do, every day.  [T16, high-attender]  I'm very thankful. I'm very grateful. Because it's hard. It’s hard out here. Everything's getting expensive. (Without free camp) I would still have worried about, like if (my older son) did go the football practice, who was going to be able to watch her? And things like that.  [T03, low attender]  Um, a little bit of a little bit of peace during the day, of course. Not that he's a bad child, not at all, but it's, you know, it's nice to have a break.  [T16, high-attender]  By the time I get off, I’m a little bit tired. The days that I do, don’t have to take them nowhere, I would like to rest. It leaves me trying to cram all everything for a weekend or so. […] And that, it just makes me happy that she gets the opportunity to, you know, to go to camp this year. |
| Challenges | High cost was the primary reason that families assigned to summer as usual (control) did not engage with summer programming. Cost impacted camp selection and camp attendance.  Features of program delivery can create structural barriers to access while program features need to be appealing | **[T13, control (attended other program)]**  I think one of the biggest challenges this year was just finding affordable um, camps for the kids. I think that's the biggest, because when you're talking about three kids, even if they're charging $100 per child a week, it's still $300 a week and $300 times for this, like $1,200. So, I think it's just finding affordable, um affordable, reliable, some place where you want to send them over the summer is kind of the biggest thing.  [T17, control]  Um nope, just couldn't afford it! … it's $75 dollars a week. Or it’s $65 dollars a week, and it's just like, that's a lot, you know. And some people might not think that's a lot, but when you have other things on top of stuff, and it's just like, I can't do it.  [T05, control (attended other program)]  (A previous camp was) more strict. It’s more like, just they just sit in the classroom and do homework and things. It’s not like… they get only like 30 minutes outside. And so, it’s basically like going to a summer school or something.  [T01, control]  (Staff knowing the children is important), more so than the lack of staff. Because it could be 20 people in there, but if they don’t all know that these kids have this, this and that, then it doesn’t matter because they don’t have the education to help the kids. |
