# Supplementary material for: “I feel better as a parent” – summer programs help support children’s health behaviors and parent wellbeing
Source: Research Square preprint supplement (doi:10.21203/rs.3.rs-9125988/v1), 2026-04-23
Supplement: Supplementary file 5 [file c65590019c2933ff14dbd1a5.docx]

**Additional file 6: Influence of family needs and program cost**

| Family needs | Families who had the fewest resources to manage the challenges of summer (e.g., lack of childcare, less family support) reported greater need for summer programming. | [T06, high-attender]  It's close to our house. It's like, five minutes away. It's each week of summer, which is nice. We don't have to make alternative plans for weeks that it's not happening. It's full-day. That's also a huge benefit, because, you know, I'm on meetings all day, so I can't go and pick them up at 12.30.  [T19, high-attender]  (Providing food is beneficial because) sometimes that's the only way that certain kids are able to eat.  [T02, high-attender]  So, (transport) would have been helpful … getting (sibling) on the bus and then getting (child’s name) to camp and getting myself to work, was kinda, hectic, but it slowly fell together. |
| --- | --- | --- |
| Free programming increases access and reduces financial distress | Free programs allowed parents to direct their income toward basic necessities (food, housing), other activities or holidays. It also allowed parents to be productive in paid and unpaid work. If camps were not free, families made adjustments like working more hours and children attending less or not at all. | [T02, high-attender]  I was freaking out. Like, what am I going to do? Because I am, unfortunately, a single mother, so I can't just stay home from work because my kids are home. So that's a big thing.  [T16, high-attender]  (If she didn’t get free camp) she probably would have been sad, to be honest.  [T12, high-attender]  (The alternative camp was $200 a week). All we would have been doing was working for her to attend camp. And for that it's like, well, what? Do we not work and stay home just to save the money? So, it would have made it a lot more stressful with that aspect. |
| Without free camp | Summer programming provided a safety-net for some families that helped support their children’s health and wellbeing. | [T19, high-attender]  (Without free camp) they wouldn't have gotten playtime, they wouldn't have gotten much attention, because I'm at work, so, I can't really attend to your attentions, your needs, cause I'm going to be at work and you will be at home, and nine times out of 10 they might have had to (be home alone). I would have to figure it out or make them stay home.  [T02, high-attender]  (Without free camp,) I’d have been stressed-out. I’d have been, um, having to make some very, very difficult decisions because my kids, like I said, previously, they used to go to their dad. But we did have some, some incidents, with their dad, where now they, they kinda don't want to be bothered with him. |
| Logistical challenges engaging with programs | Parents faced practical challenges in finding and engaging in summer programs which impacted enrolment and attendance. Parents experienced challenges finding, choosing and enrolling in programs and organising logistics of attendance (transport/work/ travel). | [T12, high-attender]  So, then I wish I had found other-other things … what I did end up doing was like finding, okay, a cheer camp here for one week, a cheer camp or a dance camp here for one week. And the drawback to those, was they're only okay, nine to 12. So now I'm having a run across town, drop you off and run back cross town pick you up. And, and so, so that first summer, led me to know, okay, so you got to do things earlier and figure out things for the next summer.  [T07, low-attender]  I did work out a temporary schedule change at my job for the sake of having some extra time in the mornings for the summer. So I was, prior to making that arrangement, I was getting to work late, so it was a challenge at the beginning, but once I made the arrangements at work to adjust my schedule for the summer, that helped. |
| Reasons for low-attendance in free programming | Reasons for low-attendance included child choice, availability of other opportunities, managing medical conditions (staying home on high-allergy days), family holidays and lack of transport. | [T07, low-attender]  And were a couple days that she just simply was tired, and asked “Can I just go to Grandma’s today?”. There were a couple days in there like that. But in in general, she was very excited for it. Very, very interested. She made some good friends throughout so she, I mean, it was overall beneficial.  [T18, low-attender]  There, I had no problem with accessing it and using it. Um, I gave (child’s name) one day off per week because, like I told you, when we started, she was complaining that she had no break, so I think we chose, like Wednesday or something, would be the day that she didn't go. So, she went Monday, Tuesday, was off Wednesday, and then she would go Thursday, Friday. So, she was only, I told her she could only choose one day for a week.  [T04, non-attender]  Yeah, he is very shy, so he doesn't like really big camps. So we went, like, a couple of days, and he just, he wanted to go with my husband and play with the kids at that camp because it was so small. |
