# Supplementary material for: “I feel better as a parent” – summer programs help support children’s health behaviors and parent wellbeing
Source: Research Square preprint supplement (doi:10.21203/rs.3.rs-9125988/v1), 2026-04-23
Supplement: Supplementary file 6 [file ce73848d4e04ccf93fe5999d.docx]

**Additional file 3: Coding Tree**

| **Name** | **Files** | **References** |
| --- | --- | --- |
| RQ1. Summer experiences | 0 | 0 |
| 1. Comparison between summer and school | 0 | 0 |
| Differences | 23 | 76 |
| 1. Family function | 15 | 35 |
| Childcare | 6 | 8 |
| Lifestyle factors and summer circumstances | 5 | 6 |
| Parent Work Schedule | 6 | 9 |
| Supervising Parent or Family Member | 7 | 12 |
| 2. Health behaviours | 8 | 11 |
| Food | 0 | 0 |
| Day camp provides less food | 1 | 1 |
| Eating out more | 1 | 1 |
| Eating schedule | 6 | 8 |
| Increased Consumption | 6 | 9 |
| Increasing Grocery Bill | 4 | 4 |
| Person Preparing Food | 3 | 5 |
| Types of Food | 2 | 2 |
| Screen Time Increases | 6 | 7 |
| Sleep Schedule | 0 | 0 |
| Activities impact sleep schedule | 5 | 6 |
| Bedtime | 0 | 0 |
| Bed time later in summer | 14 | 17 |
| Less sleep rules in summer | 9 | 10 |
| Train bedtime routine in lead-up to school | 1 | 1 |
| Waking | 0 | 0 |
| More sleep in summer | 1 | 1 |
| Wake time variable | 2 | 2 |
| Wake up later in summer | 11 | 12 |
| Sports and activities schedule | 3 | 4 |
| 3. Typical time-use patterns | 19 | 30 |
| 1. Where children spend time | 11 | 14 |
| Children home all day | 7 | 7 |
| Usually attends programming instead of school | 6 | 7 |
| 2. How children spend time | 13 | 16 |
| Child summer entertainment | 4 | 4 |
| Less Socializing with Friends | 1 | 1 |
| Routines relax | 9 | 11 |
| Less Structure or Routine | 6 | 9 |
| Routines relax | 2 | 2 |
| Similarities or consistencies | 0 | 0 |
| 1. Family and work roles | 21 | 34 |
| Family Roles | 16 | 18 |
| Parent work schedule | 15 | 16 |
| 2. Routines | 16 | 24 |
| Eating schedule | 4 | 5 |
| General routines | 12 | 15 |
| Sleep schedule | 0 | 0 |
| Bed time same | 13 | 14 |
| Wake time same | 7 | 7 |
| Sports Team Involvement | 3 | 4 |
| 2. Challenges of summer | 0 | 0 |
| 1. Competing caregiver responsibilities | 12 | 24 |
| Childcare | 11 | 12 |
| Parent employment | 7 | 12 |
| 2. Financial challenges | 10 | 24 |
| Cost of food or meal provision at home | 5 | 8 |
| Finding Affordable Program and Activities | 6 | 8 |
| Limited resources and income | 6 | 8 |
| 3. Keeping kids healthy | 8 | 9 |
| Keeping kids active | 2 | 2 |
| Maintaining healthy diet | 3 | 4 |
| Weather | 3 | 3 |
| 4. Managing time-use activities boredome and structure | 0 | 0 |
| Governing daily routines, structure and schedules | 0 | 0 |
| Transportation of children | 1 | 1 |
| Typical time-use patterns | 0 | 0 |
| Child Activities and boredom | 10 | 17 |
| Keeping a Routine or Structure | 4 | 5 |
| Managing the return to school | 0 | 0 |
| Back to School Routine | 4 | 5 |
| Grades or schoolwork | 1 | 1 |
| 5. Psychosocial | 0 | 0 |
| Emotional strain | 12 | 19 |
| Child low mood | 1 | 1 |
| Increase Parent Anxiety and Worry | 6 | 6 |
| Parent frustration OR stress | 10 | 12 |
| Navigating family dynamics | 4 | 10 |
| Consistent Family Time | 1 | 2 |
| Sibling interactions | 2 | 5 |
| Siblings with Different Needs and Wants | 1 | 3 |
| Social engagement and development | 4 | 5 |
| Child isolation | 1 | 1 |
| Child Unhappy | 1 | 1 |
| Opportunities to socialize | 3 | 3 |
| 3. Benefits of summer | 0 | 0 |
| Family function - less external pressure | 0 | 0 |
| Family time | 5 | 6 |
| Practical - less external pressure | 3 | 4 |
| Convenience | 1 | 1 |
| Flexibility | 3 | 3 |
| Psychosocial | 5 | 10 |
| Child relax | 3 | 3 |
| Less Parent Stress | 2 | 5 |
| Summer fun | 1 | 2 |
| RQ2. General Summer Programming | 0 | 0 |
| 1. Challenges (general programs) | 0 | 0 |
| 1. Cost | 12 | 19 |
| Control group reasons not enrolling - cost | 3 | 4 |
| Suggested improvement - More affordable options | 3 | 3 |
| Suggested improvement - Scholarships | 1 | 1 |
| 2. Structural barriers | 0 | 0 |
| Camp design | 10 | 17 |
| Camp Size | 1 | 1 |
| Camp Time Schedule | 5 | 6 |
| Ideal program - activity update | 1 | 1 |
| Ideal program - flexibility | 1 | 1 |
| Ideal program - parent say | 1 | 2 |
| Location | 3 | 4 |
| Suggested improvement - Organization | 2 | 2 |
| Camp Programming | 0 | 0 |
| Food | 3 | 8 |
| Amount of Food | 1 | 3 |
| Culturally inclusive food | 1 | 1 |
| Not Providing Food | 1 | 1 |
| Improvement suggested - provide food throughout | 1 | 1 |
| Type of Food | 2 | 3 |
| Improvement suggested - better food type | 2 | 2 |
| Limited educational components | 1 | 1 |
| Ideal program - educational component | 2 | 2 |
| Limited physical activity | 1 | 1 |
| Program not engaging and appealing | 3 | 3 |
| Ideal program - specialty sessions | 1 | 1 |
| Limited Activities | 3 | 5 |
| Suggested improvement - Special interests in program | 2 | 2 |
| Staffing | 8 | 11 |
| Managing behaviours | 4 | 5 |
| Suggested improvement - Interviews or Selection Process | 1 | 1 |
| Number of staff | 2 | 2 |
| Staff Training | 3 | 3 |
| Staff Communication and Interaction | 1 | 1 |
| Suggested improvement - Staff Communication and Interaction | 3 | 3 |
| Unfamiliarity and Limited Trust | 1 | 1 |
| 3. Parent logistical and practical challenges | 8 | 12 |
| Child consideration factors | 8 | 12 |
| Child injury | 1 | 1 |
| Child resistance | 5 | 8 |
| Children on Different Camp Schedules | 3 | 3 |
| Control group reasons not attending - Child-specific factors | 0 | 0 |
| Child Interest | 1 | 1 |
| Medical Conditions | 1 | 1 |
| Parent planning | 0 | 0 |
| Finding an Ideal Program | 3 | 3 |
| Control group reasons not attending - Appeal to caregivers | 0 | 0 |
| Parent Camp Agreement | 1 | 1 |
| Parent Values | 1 | 1 |
| Program Trust | 1 | 1 |
| Parent managing work | 1 | 1 |
| Program Availability | 3 | 4 |
| Control group reasons not attending - Logistical or practical | 0 | 0 |
| Camp availability | 1 | 1 |
| Parent Convenience | 1 | 1 |
| Suggested improvement - More Availability | 1 | 2 |
| Signing Up for Programs | 1 | 1 |
| Transportation | 3 | 5 |
| 2. Benefits (general programs) | 0 | 0 |
| 1. Beneficial Factors of Some Camps | 0 | 0 |
| Camp programming | 3 | 3 |
| Children Engage in Activities | 1 | 1 |
| Specialty programs for specific interests | 2 | 2 |
| Facilitators to attendance | 0 | 0 |
| Affordability | 1 | 1 |
| Logistical and practical factors | 3 | 4 |
| Family help | 1 | 2 |
| Location | 1 | 1 |
| Transport to program | 1 | 1 |
| Logistical or practical features | 10 | 14 |
| Appropriate age groups | 1 | 1 |
| Camps feed children | 4 | 4 |
| Convenient Location | 3 | 4 |
| Flexibility | 1 | 1 |
| Suggested improvement - No improvements needed | 1 | 1 |
| Transportation | 2 | 3 |
| 2. Child Benefits | 0 | 0 |
| Camp programming | 15 | 24 |
| Activities | 12 | 15 |
| Learning or education | 8 | 9 |
| Health behaviours | 0 | 0 |
| Gets children out of the house | 4 | 5 |
| Without camp - home all day | 1 | 1 |
| less screen time | 3 | 3 |
| Without camp - more screen time | 2 | 2 |
| Maintain sleep routine | 1 | 1 |
| Physical activity | 7 | 8 |
| Psychosocial - children | 0 | 0 |
| Better mood | 1 | 2 |
| Comfortable Environment | 1 | 1 |
| Enjoyment | 9 | 12 |
| Social engagement and development | 0 | 0 |
| General socialization | 14 | 18 |
| Growth and Independence | 4 | 6 |
| Kids their age | 6 | 7 |
| Make Friends | 4 | 4 |
| Older role models | 2 | 2 |
| Play | 4 | 5 |
| 3. Parent Benefits | 14 | 31 |
| 1. Practical | 10 | 12 |
| Childcare | 7 | 8 |
| Caregiver can work in summer | 4 | 4 |
| Without camp - family roles change to manage | 1 | 1 |
| Parents Get Things Done | 4 | 4 |
| 2. Family function | 7 | 9 |
| General Routine | 5 | 7 |
| Keeping children active | 2 | 2 |
| 3. Psychosocial - caregivers | 8 | 10 |
| Family member breaks | 1 | 2 |
| Parents feel positive | 1 | 1 |
| Peace of mind, trust OR Less Worry | 7 | 7 |
| 3. Previous Experience - Descriptors | 0 | 0 |
| No | 5 | 7 |
| Yes | 18 | 26 |
| Programs Attended | 0 | 0 |
| AHKI Study Camp | 6 | 9 |
| Boys & Girls Club | 1 | 1 |
| City of Columbia Camp | 1 | 1 |
| Daycare Camp | 1 | 1 |
| Gym | 1 | 1 |
| Leap Heart | 1 | 1 |
| Safari (not as AHKI participant) | 3 | 4 |
| Saluda Shoals | 1 | 1 |
| Seven Oaks | 1 | 2 |
| Specialty Camps | 0 | 0 |
| Church Camp | 1 | 1 |
| Opera Camp | 1 | 1 |
| Reading Camp | 2 | 2 |
| Science and literature | 1 | 1 |
| Sports Camp | 3 | 3 |
| Sports camp - rec centre | 1 | 1 |
| Summer school | 0 | 0 |
| Unspecified camp | 7 | 9 |
| YMCA | 1 | 1 |
| THIS Summer | 0 | 0 |
| No | 2 | 2 |
| Yes | 3 | 4 |
| RQ3. Free Summer Programming BTB | 0 | 0 |
| 1. Challenges | 0 | 0 |
| Child resistance | 0 | 0 |
| Child Interest in Activities | 2 | 2 |
| Child Not Wanting To Go | 4 | 5 |
| Child overwhelm - suggestion for improvement | 1 | 1 |
| Want to stay with family | 3 | 3 |
| Logistical and practical issues | 0 | 0 |
| Camp Routine Around Work | 3 | 3 |
| Children (siblings) at different camps | 3 | 4 |
| Location | 0 | 0 |
| Transport to program | 4 | 5 |
| Provide transport to program - suggested improvement | 3 | 3 |
| Program factors | 0 | 0 |
| Behaviour management | 1 | 1 |
| Behaviour management - suggested improvement | 1 | 1 |
| Camp Organization and Communication | 8 | 8 |
| Organization and communication - suggested improvement | 2 | 2 |
| Food | 0 | 0 |
| Culturally Inclusive Food | 1 | 1 |
| Not Fresh Food | 1 | 1 |
| Provide food every week - suggested improvement | 1 | 1 |
| Ideal program - speciality sessions | 1 | 1 |
| Reasons for non or low attendance - descriptors | 8 | 24 |
| Camp function | 2 | 7 |
| Camp size | 1 | 4 |
| Child Bullying | 1 | 3 |
| Practical | 7 | 17 |
| Child Choice | 3 | 3 |
| Child interest in program content | 1 | 1 |
| Child Sickness or medical | 2 | 3 |
| Other opportunity | 2 | 4 |
| Transportation | 1 | 1 |
| Travel inc family holidays | 5 | 6 |
| 2. Benefits | 0 | 0 |
| Beneficial Features of the Camp | 0 | 0 |
| Convenient location | 5 | 7 |
| Friendly and Accommodating Staff | 3 | 5 |
| Good Communication | 1 | 2 |
| Hours of operation | 5 | 5 |
| Pick-up and drop-off | 2 | 2 |
| Program Familiarity | 1 | 1 |
| Provided Food | 4 | 4 |
| Child Benefits | 0 | 0 |
| Health behaviours | 0 | 0 |
| Health Benefits | 1 | 1 |
| Less screen or sedentary time | 3 | 3 |
| Physical Activity | 7 | 8 |
| Programming | 0 | 0 |
| Child Activities | 14 | 22 |
| Learned New Things | 5 | 6 |
| Psychosocial | 0 | 0 |
| Child Comfortable in Familiar Environment | 4 | 5 |
| Child Enjoyment | 12 | 20 |
| Social engagement and development | 0 | 0 |
| Child Engaged with Positive Role Models | 4 | 4 |
| Engage with Kids Their Age | 6 | 7 |
| General socialization | 8 | 9 |
| Increased independence | 4 | 5 |
| Make friends | 11 | 14 |
| Parent Benefits | 0 | 0 |
| Family dynamics | 0 | 0 |
| Family Relationships | 1 | 1 |
| Keeping Children Active | 3 | 5 |
| Kids more cooperative | 3 | 4 |
| Financial | 14 | 22 |
| Parent productivity | 0 | 0 |
| Ability to Work | 6 | 8 |
| Parent Gets Things Done | 2 | 4 |
| Practical or logistical | 0 | 0 |
| Childcare | 7 | 12 |
| Children Out of House | 3 | 4 |
| Supports routine or structure | 2 | 2 |
| Limited Schedule Changes | 1 | 1 |
| Maintain sleep routine | 1 | 1 |
| Psychosocial benefits for parents | 0 | 0 |
| Improved child mood or attitude | 2 | 2 |
| Parent peace of mind or relief | 4 | 5 |
| Parent Respite or Relaxation or Exercise | 5 | 5 |
| Parenting support | 4 | 4 |
| Parents feel positive | 1 | 2 |
| Control | 0 | 0 |
| Attended Programming | 3 | 5 |
| Not Attended Programming | 5 | 6 |
| Intervention | 0 | 0 |
| Differences had not received SDC | 0 | 0 |
| For Child | 0 | 0 |
| Health and health behaviours | 0 | 0 |
| Less Physical Activity or more sedentary or screen time | 2 | 2 |
| Sit at Home | 5 | 7 |
| Sleep Routine | 2 | 2 |
| Psychosocial | 0 | 0 |
| Child Boredom or low mood | 4 | 4 |
| Social interaction and development | 0 | 0 |
| Less Social Interaction | 4 | 5 |
| Participate in less activities or play | 2 | 2 |
| For Parent | 0 | 0 |
| Childcare concerns | 0 | 0 |
| Less Childcare | 5 | 8 |
| Stay with Family | 3 | 4 |
| Financial | 0 | 0 |
| Cost impacts attendance | 9 | 11 |
| Would attend if affordable camp available | 1 | 1 |
| Would attend less if not free | 1 | 2 |
| Would not send to camp | 3 | 4 |
| Would still attend camp | 4 | 4 |
| Financial Distress | 2 | 2 |
| Save money for camp | 5 | 5 |
| Logistical or practical concerns | 0 | 0 |
| Provide More Food | 1 | 2 |
| Work schedule | 6 | 6 |
| Psychosocial | 0 | 0 |
| Increased Parent Stress or Anxiety | 7 | 7 |
| Parent Mood Worsen | 1 | 1 |
| RQ5. Unused codes | 0 | 0 |
| RQ1 Summer - No perceived challenges | 3 | 3 |
| RQ2 - 1.1 Explicit reports of challenges | 0 | 0 |
| Reports no challenge (dissonance) | 3 | 3 |
| RQ2 - 4. General Program Features | 1 | 2 |
| RQ3 - 3. Express No Challenges | 2 | 2 |
| RQ4. Other | 0 | 0 |
